# Supplementary material
Source: PubMed Central journal article supplement (PMC6477894)
Supplement: 41388_2018_612_MOESM1_ESM.pdf [file 41388_2018_612_MOESM1_ESM.pdf]

1 **Supplementary Figure S1** Apoptosis level after RANKL treatment in each LM cell  
2 population. **A)** Scatter graph showing apoptosis of each LM cell population after 24h incubation  
3 with vehicle (0.1% BSA in PBS) or RANKL (100 ng/ml) (means  $\pm$  SEM, n=3, paired t-test). LM  
4 cells were stained with anti-Annexin V and PI (50 $\mu$ g/ml) and analyzed by the LSR Fortessa  
5 system. **B)** Representative FACS scattergram for panel A.

6  
7 **Supplementary Figure S2.** Differential RANKL regulation by PR signaling in MM and  
8 LM.

9 **A)** Left panel: Bar graph showing qPCR results of RANKL mRNA levels in LM cells  
10 transfected with 2 different PR siRNAs (siPR-1 and siPR-2) or scrambled control siRNA  
11 (siCtrl) for 96 h followed by treatment with or without R5020 for 24h. (means  $\pm$  SEM, n=4,  
12 \*\*\* $P$ <0.001 and \*\*\*\* $P$ <0.0001, paired two-way ANOVA). Right panel: Representative  
13 immunoblot showing PR level with or without PR knockdown. **B)** Bar graph showing the  
14 validation results of PR ChIP-Seq. Primers were designed to target 3 DNA fragments  
15 around the RANKL distal PR-binding sites: -87,360bp/-87,185bp (chr13:43,060,931-  
16 43,061,106), -87,024bp/-86,855bp (chr13:43,061,267-43,061,436) , and -86,884bp/-  
17 86,731bp (chr13:43,061,407-43,061,560) upstream of the RANKL transcription start site.  
18 (means  $\pm$  SEM, \* $P$ <0.05, paired two-way ANOVA, n=3). **C)** Scatter plot showing PR  
19 enrichment at the RANKL distal PRBS positively correlates with PR enrichment at the  
20 RANKL promoter (n=9,  $R^2$ =0.7407, \*\* $P$ <0.01, Pearson correlation). **D)** Bar graph showing  
21 IgG and PR enrichment at the RPL30 gene. (means  $\pm$  SEM, n=3) **E)** Relative PR mRNA  
22 level in MM and LM tissue (means  $\pm$  SEM, n=13, \*\* $P$ <0.01, paired Student t-test). **F)**  
23 Immunoblot showing PR protein levels in chromatin isolated from LM and MM tissues from 4  
24 patients. H3 was used as loading control of chromatin. PT: patient.

25

26 **Supplementary Figure S3.** Effects of DNA methylation on RANKL/RANK pathway. Bar  
27 graphs showing mRNA levels of RANK (A) and OPG (B) genes in primary MM and LM  
28 cells treated with or without 5'-aza for four days. (means  $\pm$  SEM, n=3) C) Bar graph  
29 showing RANKL mRNA levels treated with 5'-aza (5 $\mu$ M, 4 days) in the presence or  
30 absence of cycloheximide (100  $\mu$ g/ml, 24h). N.S. = not significant. (means  $\pm$  SEM, n=3)  
31 D) Bar graph showing MethylCap-qPCR analysis of the DNA methylation levels of RDRE  
32 (-88,092bp/-87,961bp, Left panel) and the RANKL promoter (-1,256bp/-1,118bp, Right  
33 panel) in MM and LM primary cells treated with or without 5'-aza (5 $\mu$ M) for four days  
34 (means  $\pm$  SEM, n=4, \* $P$ <0.05 and \*\* $P$ <0.01, paired two-way ANOVA). E) Bar graph  
35 showing methylation ratio (Beta value of HumanMethylation450K Array) of the RANKL  
36 promoter methylation level in MM and LM primary cells treated with or without 5'-aza  
37 (5 $\mu$ M) for four days. (means  $\pm$  SEM, n=3, paired two-way ANOVA). Each number on the  
38 X-axis indicated a CpG probe on HumanMethylation450K Array near RANKL promoter  
39 region. F) Bar graph showing MethylCap-qPCR result of RDRE in each FACS-sorted LM  
40 cell population (means  $\pm$  SEM, n=4, \* $P$ <0.05 and \*\* $P$ <0.01, paired one-way ANOVA). G)  
41 Bar graph showing qPCR result of RANKL expression levels in each FACS-sorted LM cell  
42 population treated with or without 5'-aza for 96h. (means  $\pm$  SEM, n=3, \*\* $P$ <0.01, paired t-  
43 test).

44

45 **Supplementary Figure S4.** Influence of MED12 mutation on the compositions of LM cell  
46 populations. A) Representative FACS scattergram showing LM cell population  
47 distribution. Cells isolated from WT LM and G44D LM tissues were stained with anti-CD45

48 (depleted hematopoietic cells), anti-CD34, anti-CD49b, and PI (depleted dead cells) and  
49 analyzed by the LSRFortessa system. B) Scatter graph showing quantification of the  
50 percentage of each LM cell population showed in A.
