# Supplementary material
Source: PubMed Central journal article supplement (PMC6477894)

# Supplementary Figure S1

**A**

● Veh  
■ RANKL

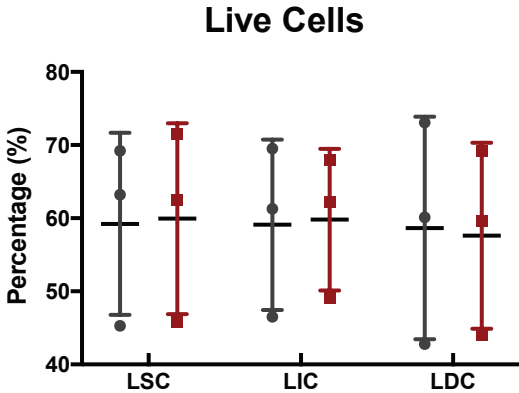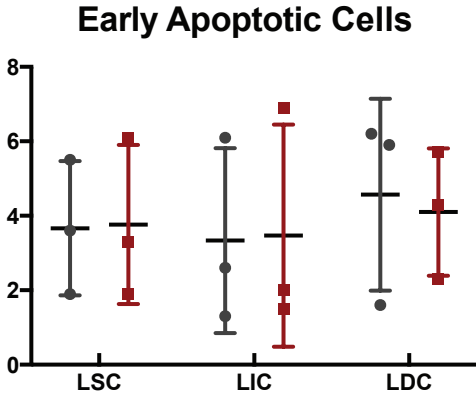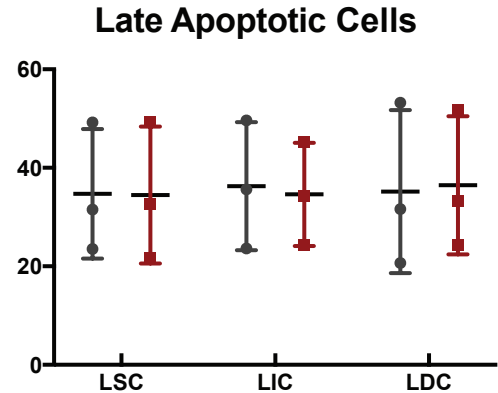

**B**

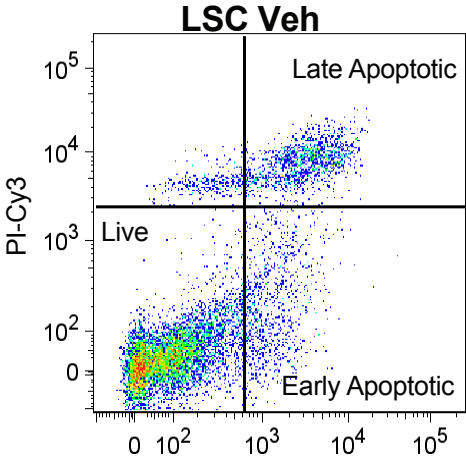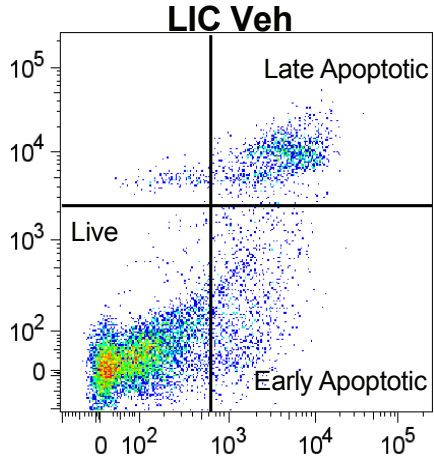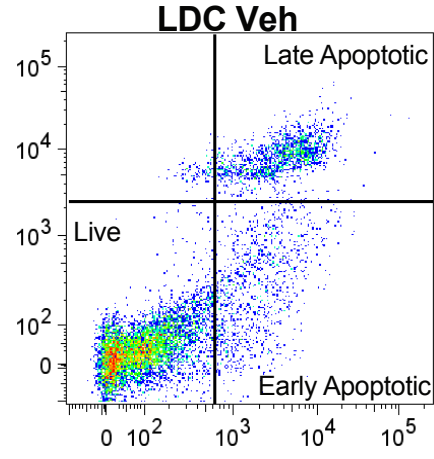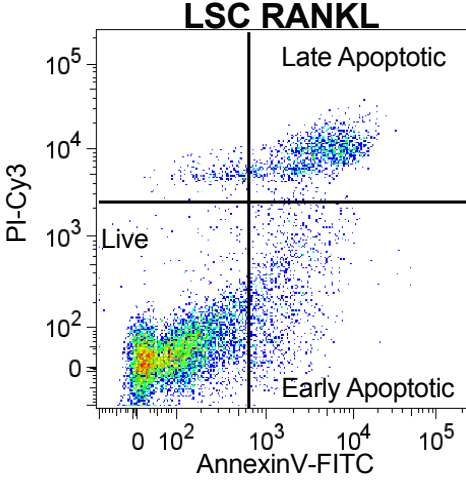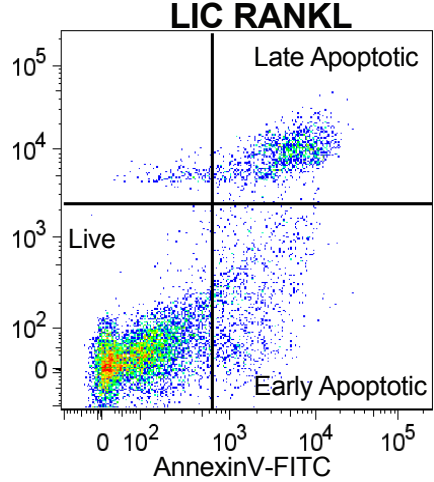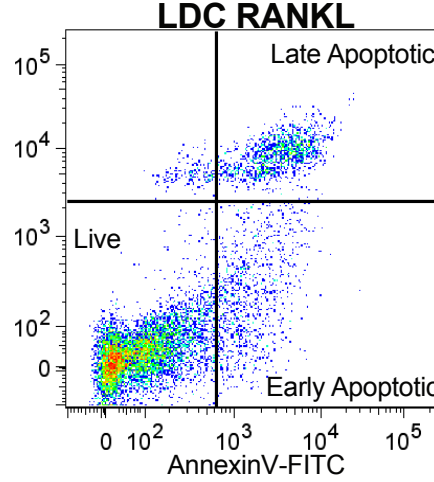

Supplement: 41388_2018_612_MOESM2_ESM.pdf [file 41388_2018_612_MOESM2_ESM.pdf]
