# Supplementary material
Source: PubMed Central journal article supplement (PMC6477894)

# Supplementary Figure S4

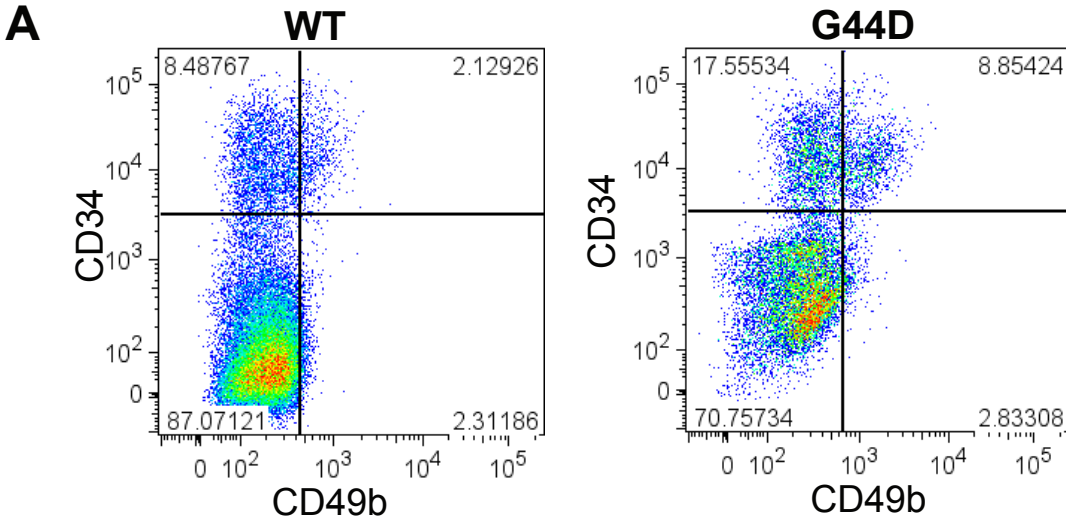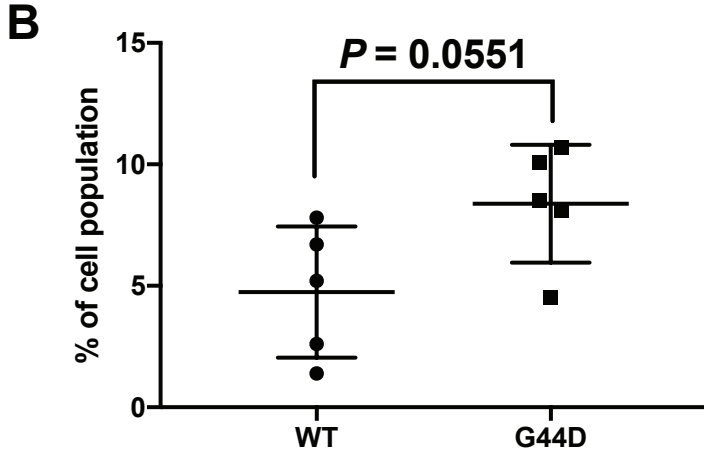

Supplement: 41388_2018_612_MOESM5_ESM.pdf [file 41388_2018_612_MOESM5_ESM.pdf]
